# Supplementary material for: Combined linkage and association analysis of classical Hodgkin lymphoma
Source: PubMed Central journal article supplement (PMC5945548; doi:10.18632/oncotarget.24872), 2018-04-17
Supplement: oncotarget-09-20377-s001.pdf [file oncotarget-09-20377-s001.pdf]

# Combined linkage and association analysis of classical Hodgkin lymphoma

## SUPPLEMENTARY MATERIALS



**Supplementary Figure 1:** LOD scores in cHL family at (A) chromosome 2, (B) chromosome 3 and (C) chromosome 21. LOD scores calculated using the Kong and Cox linear (black) exponential (blue) model.



**Supplementary Figure 2:** Regional plots of association at regions of linkage (A) chromosome 2:220,861,593–237,597,846 bp; (B) chromosome 3:42,800,778–66,729,080 bp (C) chromosome 21:42,809, 206–47,323,742 bp.  $-\log_{10} P$ -values ( $y$  axes) of the SNPs are shown according to their NCBI build 37 chromosomal positions ( $x$  axes). The red horizontal line represents the significance threshold of  $P = 4.65 \times 10^{-7}$ .
